# Supplementary material for: Co-Density Distribution Maps for Advanced Molecule Colocalization and Co-Distribution Analysis
Source: Sensors (Basel). 2021 Sep 24;21(19):6385. doi: 10.3390/s21196385 (PMC8513075; doi:10.3390/s21196385)
Supplement: Supplementary file 1 [file sensors-21-06385-s001.zip › sensors-1338078-supplementary.pdf]

*Supplementary Materials*

# Co-Density Distribution Maps for Advanced Molecule Colocalization and Co-Distribution Analysis

Ilaria De Santis <sup>1,2</sup>, Luca Lorenzini <sup>3</sup>, Marzia Moretti <sup>4</sup>, Elisa Martella <sup>5</sup>, Enrico Lucarelli <sup>6</sup>, Laura Calzà <sup>4,7</sup>  
and Alessandro Bevilacqua <sup>8,9,\*</sup>

<sup>1</sup> Department of Medical and Surgical Sciences (DIMEC), Alma Mater Studiorum—University of Bologna, I-40138 Bologna, Italy; i.desantis@unibo.it

<sup>2</sup> Interdepartmental Center Alma Mater Research Institute on Global Challenges and Climate Change (Alma Climate), Alma Mater Studiorum—University of Bologna, I-40126 Bologna, Italy

<sup>3</sup> Department of Veterinary Medical Sciences (DIMEVET), Alma Mater Studiorum—University of Bologna, I-40064 Ozzano Emilia, Italy; luca.lorenzini8@unibo.it

<sup>4</sup> Iret Foundation, I-40064 Ozzano Emilia, Italy; marzia.moretti3@unibo.it (M.M.); laura.calza@unibo.it (L.C.)

<sup>5</sup> Institute of Organic Synthesis and Photoreactivity (ISOF), National Research Council (CNR), I-40129 Bologna, Italy; elisa.martella@isof.cnr.it

<sup>6</sup> Regenerative Therapies in Oncology, IRCCS Istituto Ortopedico Rizzoli, I-40136 Bologna, Italy; enrico.lucarelli@ior.it

<sup>7</sup> Department of Pharmacy and BioTechnology (FaBiT), Alma Mater Studiorum—University of Bologna, I-40127 Bologna, Italy

<sup>8</sup> Advanced Research Center on Electronic Systems (ARCES) for Information and Communication Technologies “E. De Castro”, Alma Mater Studiorum—University of Bologna, I-40125 Bologna, Italy

<sup>9</sup> Department of Computer Science and Engineering (DISI), Alma Mater Studiorum—University of Bologna, I-40136 Bologna, Italy

\* Correspondence: alessandro.bevilacqua@unibo.it; Tel: +39-051-2095409

**Citation:** De Santis, I.; Lorenzini, L.; Moretti, M.; Martella, E.; Lucarelli, E.; Calzà, L.; Bevilacqua, A.

Co-Density Distribution Maps for Advanced Molecule Colocalization and Co-Distribution Analysis.

*Sensors* **2021**, *21*, 6385.

<https://doi.org/10.3390/s21196385>

Academic Editors: Sheryl Berlin  
Brahnam, Loris Nanni, Rick Brattin

Received: 28 July 2021

Accepted: 21 September 2021

Published: 24 September 2021

**Publisher’s Note:** MDPI stays neutral with regard to jurisdictional claims in published maps and institutional affiliations.

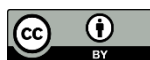

**Copyright:** © 2021 by the authors. Licensee MDPI, Basel, Switzerland. This article is an open access article distributed under the terms and conditions of the Creative Commons Attribution (CC BY) license (<http://creativecommons.org/licenses/by/4.0/>).

**Table S1.** Comparison between SYP and VGLUT1 intensity and local density colocalization analysis, before and after refinement for local co-density.

|                | SYP-VGLUT1           |         |                   |
|----------------|----------------------|---------|-------------------|
|                | co-occurrence region |         | co-density region |
|                | (n*=9343)            |         | (n*=2394)         |
|                | intensity            | density | intensity         |
| Q              | 0.2406               | 0.0773  | 0.4824            |
| Q <sub>s</sub> | 0.1286               | 0.0953  | 0.4635            |
| MOC            | 0.2420               | 0.2325  | 0.9317            |
| M <sub>1</sub> | 0.1386               | 0.1354  | 0.0411            |
| M <sub>2</sub> | 0.4574               | 0.4530  | 0.1479            |

\* n: sample size, or number of considered co-occurring pixels.

**Figure S1A.** Scatterplots of co-occurrence region partitioning by equi-density.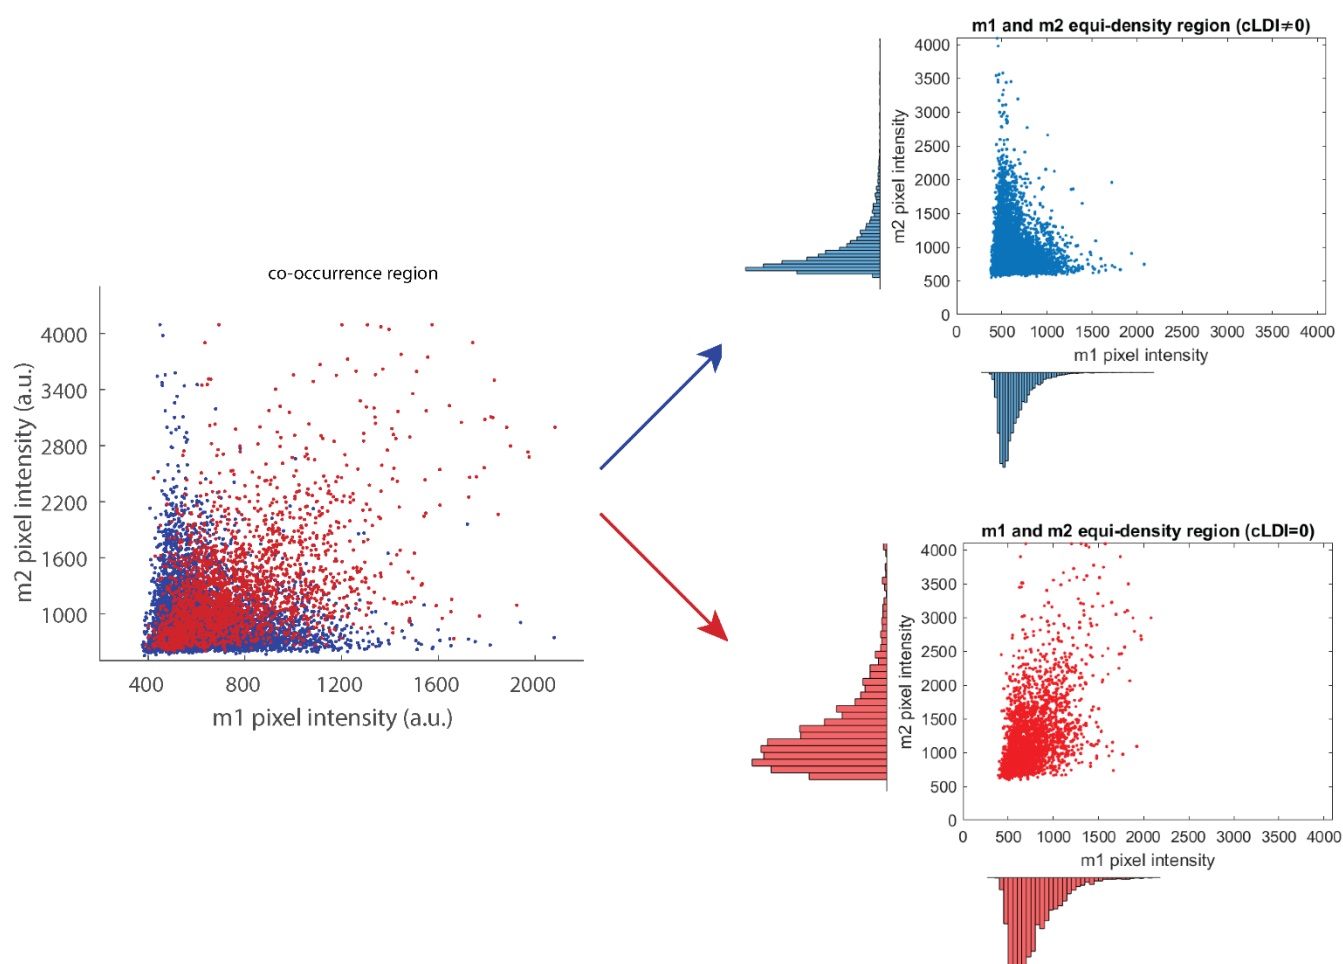

**Figure S1B.** Scatterplots of co-occurrence region partitioning by cLDI sign.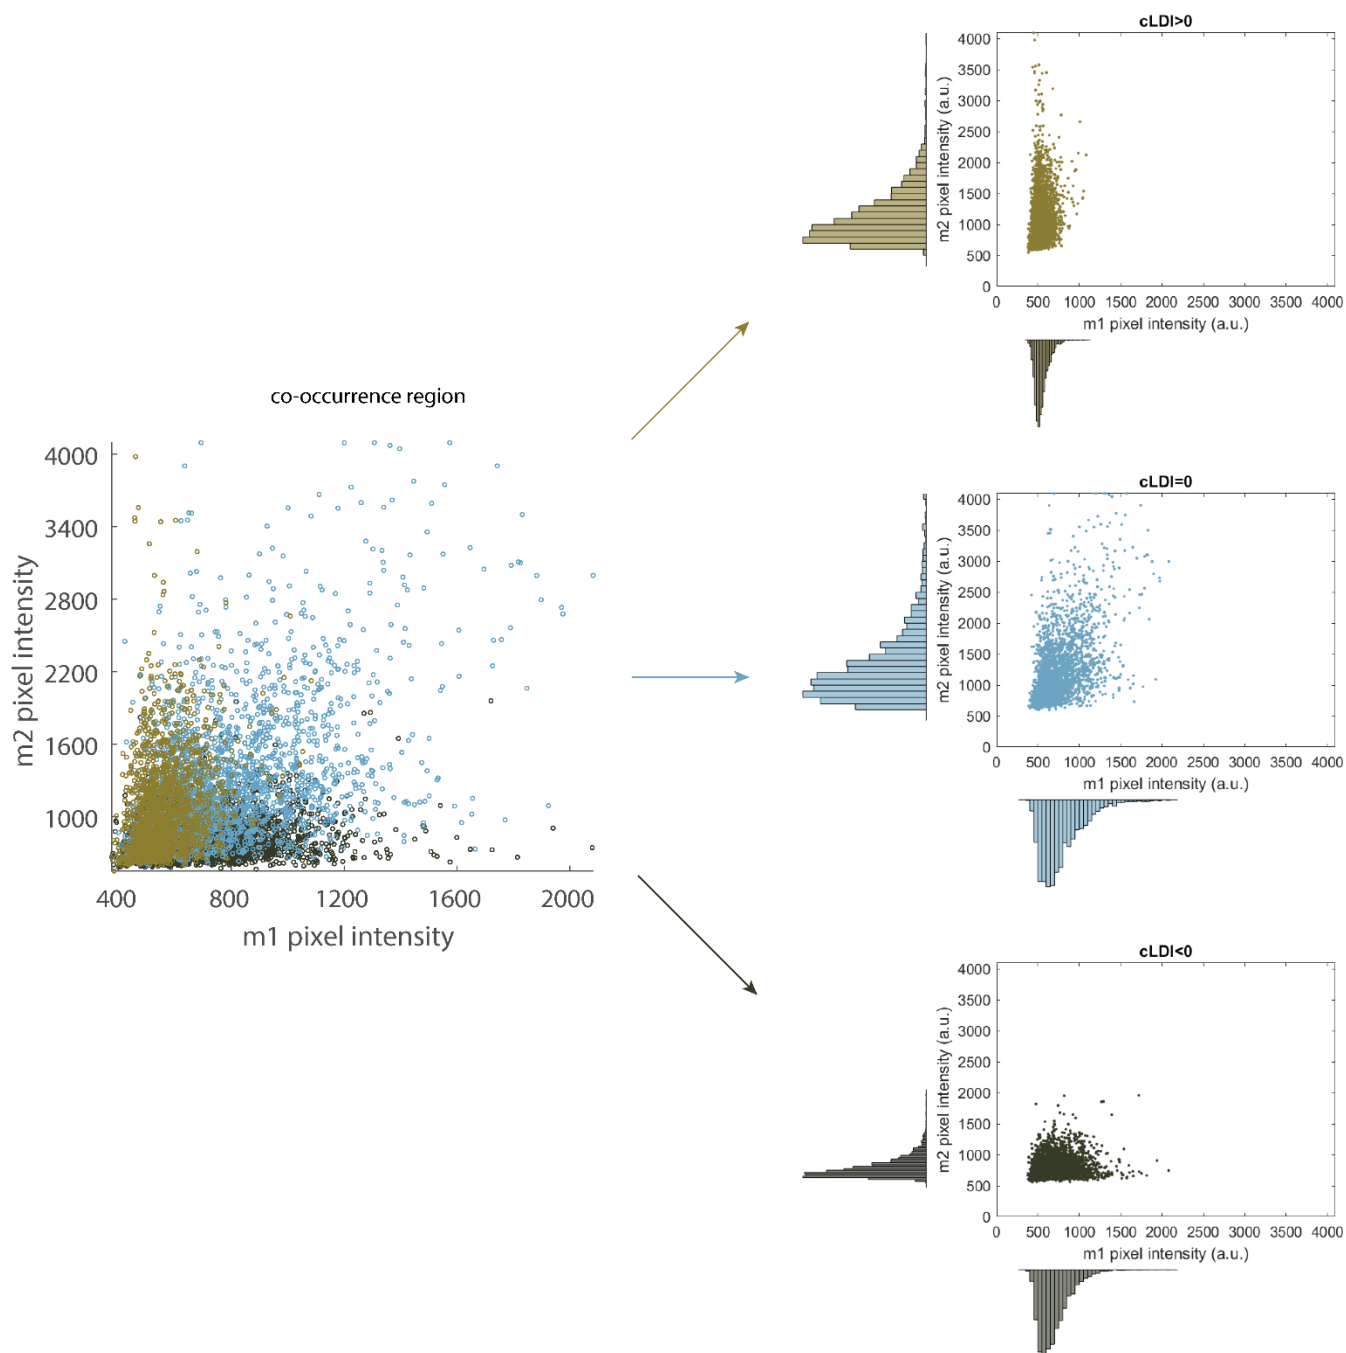**Figure S1C.** Scatterplots of co-occurrence region partitioning by cLDI value.

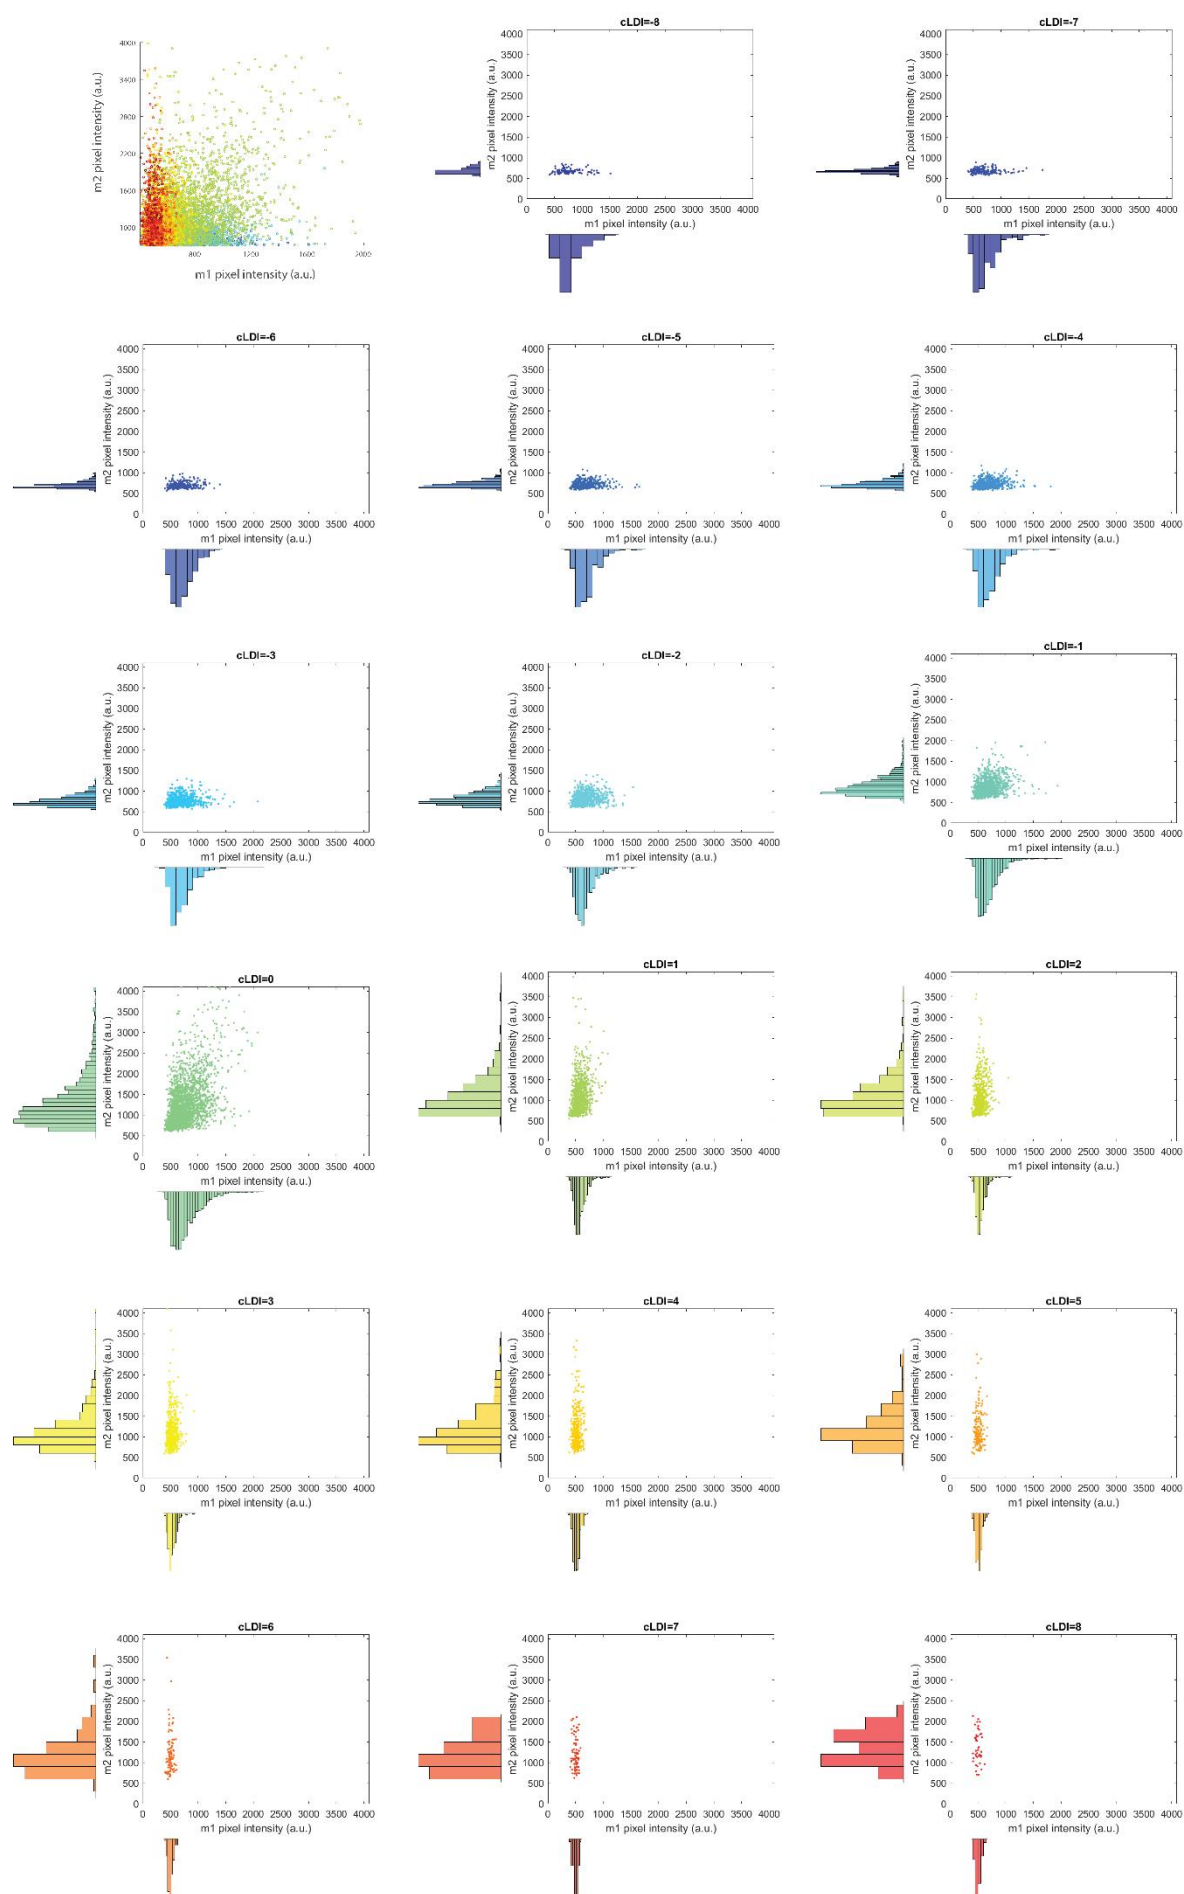

**Table S2.** *coDDMaker* time performance evaluation.

| Image size | Background correction | Locality size (image segmentation) <sup>1</sup> | Search window size (density analysis) | Elapsed Time <sup>2</sup> |
|------------|-----------------------|-------------------------------------------------|---------------------------------------|---------------------------|
| 1024×1024  | No                    | Global                                          | 3×3                                   | 20''                      |
| 512×512    | No                    | Global                                          | 3×3                                   | 15''                      |
| 512×512    | Yes                   | Global                                          | 3×3                                   | 20''                      |
| 512×512    | Yes                   | 3×3                                             | 3×3                                   | 50''                      |
| 512×512    | Yes                   | 15×15                                           | 3×3                                   | 1'20''                    |
| 512×512    | Yes                   | 15×15                                           | 9×9                                   | 1'25''                    |

<sup>1</sup>Otsu thresholding method. <sup>2</sup>Local density and co-density analysis in a couple images on a PC endowed with Intel i3-4005U, 1.70 GHz processor, and 8 GB RAM.

**Table S3.** Abbreviations.

|                      |                                                                          |
|----------------------|--------------------------------------------------------------------------|
| <b>BW</b>            | Black and White image (binary mask)                                      |
| <b>cDDM</b>          | Co-Density Distribution Map                                              |
| <b>cLDI</b>          | Local co-Density Index                                                   |
| <b>cOM</b>           | Co-Occurrence Map                                                        |
| <b>DDM</b>           | Density Distribution Map                                                 |
| <b>DMS</b>           | Dorsal Median Sulcus                                                     |
| <b>FG</b>            | Foreground                                                               |
| <b>FM</b>            | Fluoromyelin®                                                            |
| <b>GUI</b>           | Graphical User Interface                                                 |
| <b>HPL</b>           | Helix Pomatia Lectin                                                     |
| <b>IF</b>            | Immunofluorescence                                                       |
| <b>Lamp-1</b>        | Lysosomal-Associated Membrane Protein 1                                  |
| <b>LDI</b>           | Local Density Index                                                      |
| <b>M1</b>            | Mander's coefficient 1                                                   |
| <b>M2</b>            | Mander's coefficient 2                                                   |
| <b>MOC</b>           | Manders' Overlap Coefficient                                             |
| <b>NF</b>            | Neurofilament                                                            |
| <b>PTX</b>           | Paclitaxel                                                               |
| <b>SYP</b>           | Synaptophysin                                                            |
| <b>VGLUT1</b>        | Vesicular Glutamate Transporter 1                                        |
| <b>WS</b>            | (Search) Window Size                                                     |
| <b>q</b>             | Pearson's correlation coefficient (also <i>r</i> , or PCC)               |
| <b>q<sub>s</sub></b> | Spearman's correlation coefficient (also <i>r<sub>s</sub></i> , or SRCC) |
